# Supplementary material for: Water environment and social isolation affect association preference rather than kinship in toad tadpoles (Bufo formosus)
Source: Research Square preprint supplement (doi:10.21203/rs.3.rs-7930339/v1), 2025-11-17
Supplement: Supplementary file 1 [file ee2f3991a83ed3520d3428fc.xlsx]

## Sheet: シート1
Supplementary Table S1. Raw data of four types of binary-choice tests
Subject			Sibling side		Non-sibling side		Sibling side minus Non-sibling side	Spent not on either side (out of 3600s)
Rearing treatments	ID	Culutch type	Stimulus group	Spent time (out of 3600s)	Stimulus group	Spent time (out of 3600s)
Tg	Tg1b.1	1	Tg1a	1734	Tg2a	598	1136	1268
	Tg3b.1	3	Tg3a	954	Tg4a	1931	-977	715
	Tg1b.2	1	Tg1a	1900	Tg2a	1054	846	646
	Tg3b.2	3	Tg3a	1385	Tg4a	1259	126	956
	Tg2b.1	2	Tg2a	1362	Tg1a	1188	174	1050
	Tg4b.1	4	Tg4a	1608	Tg3a	904	704	1088
	Tg2b.2	2	Tg2a	427	Tg1a	2238	-1811	935
	Tg4b.2	4	Tg4a	1122	Tg3a	1892	-770	586
	Tg4a.2	4	Tg4b	2626	Tg1a	874	1752	100
	Tg4a.3	4	Tg1a	434	Tg1a	2761	-2327	405
	Tg1b3	1	Tg1a	1078	Tg4b	1458	-380	1064
	Tg4a.4	4	Tg4b	2062	Tg2b	595	1467	943
	Tg2b.4	2	Tg2a	999	Tg3b	1463	-464	1138
	Tg2a.1	2	Tg2b	1505	Tg4b	972	533	1123
	Tg3a.2	3	Tg3b	3457	Tg2a	35	3422	108
	Tg2a.2	2	Tg2b	1611	Tg4b	1085	526	904
	Tg3a.3	3	Tg3b	826	Tg2a	1343	-517	1431
	Tg3a.4	3	Tg3b	863	Tg1a	1585	-722	1152
	Tg1b.5	1	Tg1a	2005	Tg3b	804	1201	791
	Tg1a.1	1	Tg1b	994	Tg2a	1402	-408	1204
	Tg1b.6	1	Tg1a	1045	Tg3b	1978	-933	577
	Tg2a.2	2	Tg2b	1220	Tg1b	1313	-93	1067
Ts	Ts1.2	1	Tg1a	1310	Tg2a	72	1238	2218
	Ts3.1	3	Tg3a	1731	Tg4a	1039	692	830
	Ts1.4	1	Tg1a	1301	Tg2a	248	1053	2051
	Ts3.3	3	Tg3a	1347	Tg4a	1189	158	1064
	Ts2.2	2	Tg2a	1061	Tg3a	199	862	2340
	Ts4.1	4	Tg4a	0	Tg3a	1776	-1776	1824
	Ts2.3	2	Tg2a	682	Tg1a	2476	-1794	442
	Ts4.2	4	Tg4a	1037	Tg3a	1967	-930	596
	Ts4.5	4	Tg4a	1727	Tg1a	1800	-73	73
	Ts4.7	4	Tg4b	1875	Tg1a	1424	451	301
	Ts2.9	2	Tg2a	503	Tg3b	2064	-1561	1033
	Ts2.5	2	Tg2a	1822	Tg3b	916	906	862
	Ts3.7	3	Tg3b	1041	Tg2a	942	99	1617
	Ts1.3	1	Tg1a	1205	Tg4b	1869	-664	526
	Ts3.2	3	Tg3b	887	Tg2a	1303	-416	1410
	Ts1.8	1	Tg1b	1516	Tg4b	1042	474	1042
	Ts2.6	2	Tg2b	2121	Tg4b	231	1890	1248
	Ts3.4	3	Tg3b	918	Tg1a	1904	-986	778
	Ts2.10	2	Tg2b	840	Tg4b	203	637	2557
	Ts3.8	3	Tg3b	915	Tg1a	1131	-216	1554
	Ts3.6	3	Tg3b	1640	Tg1a	1081	559	879
Pg	Pg2b.1	2	Pg2a	1563	Pg1a	516	1047	1521
	Pg4b.1	4	Pg4a	983	Pg3a	1944	-961	673
	Pg4a.1	4	Pg4b	792	Pg2a	1766	-974	1042
	Pg3b.1	3	Pg3a	1576	Pg4a	1812	-236	212
	Pg4a.2	4	Pg4b	850	Pg2a	2020	-1170	730
	Pg4b.2	4	Pg4a	1800	Pg3a	1727	73	73
	Pg3b.2	3	Pg3a	1130	Pg4a	1428	-298	1042
	Pg4a.3	4	Pg4b	1638	Pg2a	1292	346	670
	Pg4a.3	4	Pg4b	2024	Pg2a	556	1468	1020
	Pg2b.3	2	Pg2a	1644	Pg4b	1038	606	918
	Pg4b.3	4	Pg4a	1227	Pg1a	2037	-810	336
	Pg2b.4	2	Pg2a	1876	Pg4b	986	890	738
	Pg1b.1	1	Pg1a	1340	Pg4a	1523	-183	737
	Pg1b.2	1	Pg1a	1127	Pg4a	2135	-1008	338
	Pg1a.1	1	Pg1b	1158	Pg2a	1756	-598	686
	Pg1a.2	1	Pg1b	1548	Pg2a	1174	374	878
	Pg2b.5	2	Pg2a	755	Pg1b	1843	-1088	1002
	Pg2a.1	2	Pg2b	1213	Pg3b	815	398	1572
	Pg2a.2	2	Pg2b	2971	Pg3b	0	2971	629
	Pg3a.1	3	Pg3b	558	Pg2b	1805	-1247	1237
	Pg3a.2	3	Pg3a	929	Pg2b	2000	-1071	671
	Pg3b.3	3	Pg3a	2016	Pg1a	893	1123	691
	Pg3a.3	3	Pg3a	1415	Pg1a	932	483	1253
	Pg1b.3	1	Pg1a	1628	Pg3a	989	639	983
	Pg1a.4	1	Pg1b	1072	Pg3b	1624	-552	904
Ps	Ps2.1	2	Pg2a	15	Pg1a	2700	-2685	885
	Ps4.9	4	Pg4a	1313	Pg3a	629	684	1658
	Ps2.5	2	Pg2a	744	Pg1a	313	431	2543
	Ps4.6	4	Pg4a	527	Pg3a	898	-371	2175
	Ps1.3	1	Pg1a	649	Pg2a	685	-36	2266
	Ps3.1	3	Pg3a	989	Pg4a	1938	-949	673
	Ps1.4	1	Pg1a	691	Pg2a	2576	-1885	333
	Ps3.4	3	Pg3a	942	Pg4a	1170	-228	1488
	Ps4.7	4	Pg4b	2020	Pg2a	850	1170	730
	Ps4.1	4	Pg4b	584	Pg2a	1406	-822	1610
	Ps4.4	4	Pg4a	588	Pg1a	511	77	2501
	Ps4.5	4	Pg4a	92	Pg1a	1408	-1316	2100
	Ps2.2	2	Pg2a	1721	Pg4b	1254	467	625
	Ps1.10	1	Pg1a	1116	Pg4a	1672	-556	812
	Ps1.1	1	Pg1a	1811	Pg4a	185	1626	1604
	Ps2.3	2	Pg2b	1445	Pg3b	1170	275	985
	Ps2.9	2	Pg2b	937	Pg3b	2113	-1176	550
	Ps3.9	3	Pg3b	1653	Pg2b	994	659	953
	Ps3.7	3	Tg3b	609	Tg1a	992	-383	1999
	Ps3.6	3	Pg3a	1777	Pg1a	546	1231	1277
	Ps3.8	3	Pg3a	1886	Pg1a	380	1506	1334
	Ps1.8	1	Pg1a	1545	Pg3a	1852	-307	203
